# Supplementary material
Source: ML conference proceedings conference paper supplement (https://proceedings.neurips.cc/paper_files/paper/2021/hash/680390c55bbd9ce416d1d69a9ab4760d-Abstract.html)
Supplement: Supplementary file [file 680390c55bbd9ce416d1d69a9ab4760d-Supplemental.pdf]

## A Appendix

**Lemma 1.** Let  $X : \Omega \rightarrow \mathbb{R}$  be a random variable on  $(\Omega, \mathcal{F}, \mathbb{P})$  satisfying  $X \in L_1$ , and let  $A \in \mathcal{F}$  be an event with  $\mathbb{P}(A) > 0$ . Then, for any  $\tau \geq 0$

$$\mathbb{E}[X|A] \leq \mathbb{E}X + \tau\Psi_X(1/\tau) - \tau \log \mathbb{P}(A). \quad (3)$$

*Proof.* Starting with the definition of conditional expectation, for any  $\tau \geq 0$  we have

$$\begin{aligned} \mathbb{E}[X|A] &= \frac{1}{\mathbb{P}(A)} \int_A X(\omega) d\mathbb{P}(\omega) \\ &= \frac{\tau}{\mathbb{P}(A)} \int_A \log \exp(X(\omega)/\tau) d\mathbb{P}(\omega) \\ &\leq \tau \log \left( \frac{1}{\mathbb{P}(A)} \int_A \exp(X(\omega)/\tau) d\mathbb{P}(\omega) \right) \\ &= \tau \log \int_A \exp(X(\omega)/\tau) d\mathbb{P}(\omega) - \tau \log \mathbb{P}(A) \\ &\leq \tau \log \int_{\Omega} \exp(X(\omega)/\tau) d\mathbb{P}(\omega) - \tau \log \mathbb{P}(A) \\ &= \mathbb{E}X + \tau\Psi_X(1/\tau) - \tau \log \mathbb{P}(A), \end{aligned}$$

where we used Jensen's inequality in the third line.  $\square$

**Theorem 1.** Let  $X : \Omega \rightarrow \mathbb{R}$  be a random variable such that the interior of the domain of  $\Psi_X$  is non-empty, then under the same assumptions as Lemma 1 we have <sup>2</sup>

$$\mathbb{E}[X|A] \leq \mathbb{E}X + (\Psi_X^*)^{-1}(-\log \mathbb{P}(A)).$$

*Proof.* This is a combination of Lemma 1 and Lemma 5 (presented next). Lemma 5 applies because  $\Psi_X$  is Legendre type on  $\mathbb{R}_+$  since the interior of the domain of  $\Psi_X$  is non-empty [15, Thm. 2.3], and we have  $\Psi_X(0) = 0$  and  $\Psi_X'(0) = 0$ .  $\square$

**Lemma 5.** Let  $f : \mathbb{R}_+ \rightarrow \mathbb{R}$  be Legendre type with  $f(0) = 0$ ,  $f'(0) = 0$  and denote the convex conjugate of  $f$  as  $f^* : \mathbb{R} \rightarrow \mathbb{R}$ , i.e.,

$$f^*(p) = \sup_{x \geq 0} (xp - f(x)).$$

Then for  $y \geq 0$

$$\inf_{\tau \geq 0} (\tau f(1/\tau) + \tau y) = (f^*)^{-1}(y).$$

*Proof.* The  $y = 0$  case is straightforward, so consider the case where  $y > 0$ . First,  $f^*$  is Legendre type by the assumption that  $f$  is Legendre type (loosely, differentiable and strictly convex on the interior of its domain) [19, §26.4]. Since  $f(0) = 0$  and  $f'(0) = 0$  we have that  $f^*(0) = 0$  and  $(f^*)'(0) = 0$ . These imply that  $f^*$  is strictly increasing and continuous on  $\mathbf{dom} f^* \cap \mathbb{R}_+$  and has range  $\mathbb{R}_+$ , so the quantity  $(f^*)^{-1}(y)$  is well-defined for any  $y \geq 0$  and moreover  $(f^*)^{-1}(y) \geq 0$ . The Fenchel-Young inequality states that

$$f(1/\tau) + f^*(p) \geq p/\tau,$$

for any  $p, \tau \in \mathbb{R}_+$  with equality if and only if  $(1/\tau) = (f^*)'(p)$ . Fix  $p = (f^*)^{-1}(y)$  and note that  $p > 0$  since  $y > 0$ . Then for  $\tau \geq 0$  we have

$$\tau f(1/\tau) + \tau y \geq (f^*)^{-1}(y).$$

Equality is attained by  $\tau = 1/(f^*)'(p)$  with  $0 \leq \tau < \infty$ , since  $y > 0$ ,  $p \in \mathbf{dom} f^* \cap \mathbb{R}_+$ , and  $f^*$  is strictly increasing on  $\mathbf{dom} f^* \cap \mathbb{R}_+$ .  $\square$

<sup>2</sup>If  $\Psi_X = 0$ , then we take  $(\Psi_X^*)^{-1} = 0$ .

**Lemma 2.** Let  $\mu : \Omega \rightarrow \mathbb{R}^A$ ,  $\mu \in L_1^A$ , be a random variable, let  $i^* = \operatorname{argmax}_i \mu_i$  (ties broken arbitrarily) and denote by  $\Psi_i := \Psi_{\mu_i}$ , then

$$\mathbb{E} \max_i \mu_i \leq \sum_{i=1}^A \mathbb{P}(i^* = i) \left( \mathbb{E} \mu_i + (\Psi_i^*)^{-1}(-\log \mathbb{P}(i^* = i)) \right).$$

*Proof.* This follows directly from the definition of the maximum and Theorem 1.

$$\mathbb{E} \max_i \mu_i = \sum_{i=1}^A \mathbb{P}(i^* = i) \mathbb{E}[\mu_i | i^* = i] \leq \sum_{i=1}^A \mathbb{P}(i^* = i) \left( \mathbb{E} \mu_i + (\Psi_i^*)^{-1}(-\log \mathbb{P}(i^* = i)) \right).$$

□

**Lemma 3.** Let alg produce any sequence of policies  $\pi^t$ ,  $t = 1, \dots, T$ , that satisfy  $\pi^t \in \mathcal{P}_\phi^t$ , then

$$\text{BayesRegret}(\phi, \text{alg}, T) \leq \mathbb{E} \sum_{t=1}^T \sum_{i=1}^A \pi_i^t (\Psi_i^{t*})^{-1}(-\log \pi_i^t).$$

*Proof.* Starting with the definition of Bayesian regret in Equation (2),

$$\begin{aligned} \text{BayesRegret}(\phi, \text{alg}, T) &= \mathbb{E} \sum_{t=1}^T \left( \max_i \mu_i - r_t \right) \\ &= \mathbb{E} \sum_{t=1}^T \left( \mathbb{E}^t \max_i \mu_i - \sum_{i=1}^A \pi_i^t \mathbb{E}^t \mu_i \right) \\ &\leq \mathbb{E} \sum_{t=1}^T \sum_{i=1}^A \pi_i^t (\Psi_i^{t*})^{-1}(-\log \pi_i^t) \end{aligned}$$

which follows from the tower property of conditional expectation and lemma 2. □

**Theorem 2.** Let alg produce any sequence of policies  $\pi^t$ ,  $t = 1, \dots, T$ , that satisfy  $\pi^t \in \mathcal{P}_\phi^t$  and assume that both the prior and reward noise are 1-sub-Gaussian for each arm, then

$$\text{BayesRegret}(\phi, \text{alg}, T) \leq \sqrt{2AT \log A(1 + \log T)} = \tilde{O}(\sqrt{AT}).$$

*Proof.* Since the prior and noise terms are 1-sub-Gaussian for each arm, we can bound the cumulant generating function of  $\mu_i$  at time  $t$  as

$$\Psi_i^t(\beta) \leq \frac{\beta^2}{2(n_i^t + 1)}, \quad (13)$$

where  $n_i^t$  is the number of observations of arm  $i$  before time  $t$ . A quick calculation yields the following bound for  $y \geq 0$

$$(\Psi_i^{t*})^{-1}(y) \leq \sqrt{\frac{2y}{n_i^t + 1}}. \quad (14)$$

Combining this with Lemma (3),

$$\begin{aligned} \text{BayesRegret}(\phi, \text{alg}, T) &\leq \mathbb{E} \sum_{t=1}^T \sum_{i=1}^A \pi_i^t (\Psi_i^{t*})^{-1}(-\log \pi_i^t) \\ &\leq \mathbb{E} \sum_{t=1}^T \sum_{i=1}^A \pi_i^t \sqrt{\frac{-2 \log \pi_i^t}{n_i^t + 1}} \\ &\leq \mathbb{E} \sqrt{\sum_{t=1}^T H(\pi^t) \sum_{t=1}^T \sum_{i=1}^A \frac{2\pi_i^t}{n_i^t + 1}} \end{aligned}$$

which follows from Cauchy-Schwarz. To conclude the proof we use the fact that  $H(\pi_t) \leq \log(A)$  and a pigeonhole principle included as Lemma 6. □

**Lemma 6.** Consider a process that at each time  $t$  selects a single index  $a_t$  from  $\{1, \dots, q\}$  with probability  $p_{a_t}^t$ . Let  $n_i^t$  denote the count of the number of times index  $i$  has been selected before time  $t$ . Then

$$\mathbb{E} \sum_{t=1}^T \sum_{i=1}^q \frac{p_i^t}{n_i^t + 1} \leq q(1 + \log T).$$

*Proof.* This follows from an application of the pigeonhole principle,

$$\begin{aligned} \mathbb{E} \sum_{t=1}^T \sum_{i=1}^q \frac{p_i^t}{n_i^t + 1} &= \mathbb{E} \sum_{t=1}^T \mathbb{E}_{a_t \sim p^t} (n_{a_t}^t + 1)^{-1} \\ &= \mathbb{E}_{a_1 \sim p^1, \dots, a_T \sim p^T} \mathbb{E} \sum_{t=1}^T (n_{a_t}^t + 1)^{-1} \\ &= \mathbb{E}_{n_1^{T+1}, \dots, n_q^{T+1}} \mathbb{E} \sum_{i=1}^q \sum_{t=1}^{n_i^{T+1}} 1/t \\ &\leq q \sum_{t=1}^T 1/t \\ &\leq q(1 + \log T). \end{aligned}$$

□

**Lemma 4.** Assuming that  $R \in L_1^{m \times A}$  we have

$$\mathbb{E}^t V_{R, \Lambda}^* \leq \max_{\pi \in \Delta_A} \mathcal{G}_{\phi, \Lambda}^t(\pi). \quad (10)$$

*Proof.* Using Jensen's inequality and then the upper bound in Equation 5 we obtain

$$\begin{aligned} \mathbb{E}^t V_{R, \Lambda}^* &= \mathbb{E}^t \min_{\lambda \in \Lambda} \max_{\pi \in \Delta_A} \lambda^\top R \pi \\ &\leq \min_{\lambda \in \Lambda} \mathbb{E}^t \max_{\pi \in \Delta_A} \lambda^\top R \pi \\ &= \min_{\lambda \in \Lambda} \mathbb{E}^t \max_j (R^\top \lambda)_j \\ &\leq \min_{\lambda \in \Lambda, \tau \geq 0} \max_{\pi \in \Delta_A} \sum_{j=1}^A \pi_j (\lambda^\top \mathbb{E}^t R_j + \tau_j \Psi_j^t(\lambda/\tau_j) - \tau_j \log \pi_j) \\ &= \max_{\pi \in \Delta_A} \min_{\lambda \in \Lambda, \tau \geq 0} \sum_{j=1}^A \pi_j (\lambda^\top \mathbb{E}^t R_j + \tau_j \Psi_j^t(\lambda/\tau_j) - \tau_j \log \pi_j) \\ &= \max_{\pi \in \Delta_A} \mathcal{G}_{\phi, \Lambda}(\pi), \end{aligned} \quad (15)$$

where we could swap the min and max using the minimax theorem. □

**Theorem 3.** Let alg produce any sequence of policies  $\pi^t$ ,  $t = 1, \dots, T$ , that satisfy  $\pi^t \in \mathcal{P}_{\phi, \Lambda}^t$  and let the opponent produce any policies  $\lambda^t$ ,  $t = 1, \dots, T$ , adapted to  $\mathcal{F}_t$ . Assuming that the prior over each entry of  $R$  and reward noise are 1-sub-Gaussian we have

$$\text{BayesRegret}(\phi, \text{alg}, T) \leq \sqrt{2AmT \log A(1 + \log T)} = \tilde{O}(\sqrt{mAT}).$$

*Proof.* This is a straightforward extension of the techniques in Theorem 2. First, let us denote by

$$\mathcal{L}_R^t(\pi, \lambda, \tau) = \sum_{j=1}^A \pi_j (\lambda^\top \mathbb{E}^t R_j + \tau_j \Psi_j^t(\lambda/\tau_j) - \tau_j \log \pi_j).$$

Since the prior and noise terms are 1-sub-Gaussian for each entry of  $R$ , we can bound the cumulant generating function of  $R_j$  at time  $t$  as

$$\Psi_j^t(\beta) \leq \sum_{i=1}^m \frac{\beta_i^2}{2(n_{ij}^t + 1)}, \quad (16)$$

where  $n_{ij}^t$  is the number of observations of entry  $i, j$  before time  $t$ . Then, using Lemma 4

$$\begin{aligned} \text{BayesRegret}(\phi, \text{alg}, T) &= \mathbb{E} \sum_{t=1}^T (V_{R, \Lambda}^* - r_t) \\ &= \mathbb{E} \sum_{t=1}^T \mathbb{E}^t (V_{R, \Lambda}^* - r_t) \\ &\leq \mathbb{E} \sum_{t=1}^T \left( \min_{\lambda \in \Lambda, \tau \geq 0} \mathcal{L}_R^t(\pi^t, \lambda, \tau) - (\lambda^t)^\top (\mathbb{E}^t R) \pi^t \right) \\ &\leq \mathbb{E} \sum_{t=1}^T \left( \min_{\tau} \mathcal{L}_R^t(\pi^t, \lambda^t, \tau) - (\lambda^t)^\top (\mathbb{E}^t R) \pi^t \right) \\ &= \sum_{t=1}^T \sum_{j=1}^A \pi_j^t \min_{\tau_j} (\tau_j \Psi_j^t(\lambda^t / \tau_j) - \tau_j \log \pi_j^t) \\ &\leq \sum_{t=1}^T \sum_{j=1}^A \pi_j^t \min_{\tau_j} \left( \sum_{i=1}^m \frac{(\lambda_i^t)^2}{2\tau_j(n_{ij}^t + 1)} - \tau_j \log \pi_j^t \right) \\ &= \sum_{t=1}^T \sum_{j=1}^A \pi_j^t \sqrt{\sum_{i=1}^m \frac{-2(\lambda_i^t)^2 \log \pi_j^t}{(n_{ij}^t + 1)}} \\ &\leq \sqrt{\sum_{t=1}^T H(\pi^t)} \sqrt{2 \sum_{t=1}^T \sum_{i,j} \frac{\lambda_i^t \pi_j^t}{(n_{ij}^t + 1)}} \\ &\leq \sqrt{2mAT(\log A)(1 + \log T)}, \end{aligned}$$

where we used the sub-Gaussian bound Eq. (16), Cauchy-Schwarz, the fact that  $\lambda^t$  is a probability distribution adapted to  $\mathcal{F}_t$ , and the pigeonhole principle Lemma 6.  $\square$

**Theorem 4.** *Let alg produce any sequence of policies  $\pi^t$ ,  $t = 1, \dots, T$ , that satisfy  $\pi^t \in \mathcal{P}_{\phi, \Lambda}^t$  and assume that the prior over each entry of  $R$  and reward noise are 1-sub-Gaussian and that  $\|\lambda^*\|_2 \leq C$   $\phi$ -almost surely, then*

$$\text{BayesRegret}(\phi, \text{alg}, T) \leq C \left( \sqrt{2 \log A(1 + \log T)} + 2\sqrt{m} \right) \sqrt{AT} = \tilde{O}(\sqrt{mAT}).$$

*Proof.* Let  $\lambda^{t*} = \operatorname{argmin}_{\lambda \in \Lambda} \lambda^\top R \pi^t$ , which exists for any fixed  $R$  since the set  $\Lambda$  is compact and the objective function is linear. Note that  $R$  is a random variable, and so  $\lambda^{t*}$  is also a random variable for all  $t$ , and note that the reward we defined at time  $t$  is given by  $r_t = (\lambda^{t*})^\top R \pi^t$ . Let us denote by

$$\mathcal{L}_R^t(\pi, \lambda, \tau) = \sum_{j=1}^A \pi_j (\lambda^\top \mathbb{E}^t R_j + \tau_j \Psi_j^t(\lambda / \tau_j) - \tau_j \log \pi_j).$$

Since the prior and noise terms are 1-sub-Gaussian for each entry of  $R$ , we can bound the cumulant generating function of  $R_j$  at time  $t$  as

$$\Psi_j^t(\beta) \leq \frac{\|\beta\|^2}{2(n_j^t + 1)}, \quad (17)$$

where  $n_j^t$  is the number of observations of column  $j$  before time  $t$  (the agent observes outcomes from all rows, hence the use of  $n_j^t$  rather than  $n_{ij}^t$ ). Now with the definition of the Bayesian regret and using Lemma 4

$$\begin{aligned} \text{BayesRegret}(\phi, \text{alg}, T, \mu) &= \mathbb{E} \sum_{t=1}^T (V_{R, \Lambda}^* - r_t) \\ &\leq \mathbb{E} \sum_{t=1}^T \left( \min_{\lambda \in \Lambda, \tau \geq 0} \mathcal{L}_R^t(\pi^t, \lambda, \tau) - \mathbb{E}^t((\lambda^{t*})^\top R \pi^t) \right) \\ &\leq \mathbb{E} \sum_{t=1}^T \left( \min_{\tau} \mathcal{L}_R^t(\pi^t, \mathbb{E}^t \lambda^{t*}, \tau) - \mathbb{E}^t((\lambda^{t*})^\top R \pi^t) \right). \end{aligned}$$

Now we write the last line above as

$$\mathbb{E} \sum_{t=1}^T \left( \min_{\tau} \mathcal{L}(\pi^t, \mathbb{E}^t \lambda^{t*}, \tau) - (\pi^t)^\top \mathbb{E}^t R \mathbb{E}^t \lambda^{t*} + (\pi^t)^\top \mathbb{E}^t R \mathbb{E}^t \lambda^{t*} - (\pi^t)^\top \mathbb{E}^t (R \lambda^{t*}) \right),$$

which we shall bound in two parts. First, we use the standard approach we have used throughout this manuscript. Using Eq. (17).

$$\begin{aligned} \mathbb{E} \sum_{t=1}^T \left( \min_{\tau} \mathcal{L}(\pi^t, \mathbb{E}^t \lambda^{t*}, \tau) - (\pi^t)^\top \mathbb{E}^t R \mathbb{E}^t \lambda^{t*} \right) &= \mathbb{E} \sum_{t=1}^T \sum_{i=1}^A \pi_i^t \min_{\tau_i \geq 0} \left( \tau_i \Psi_i^t(\mathbb{E}^t \lambda^{t*} / \tau_i) - \tau_i \log \pi_i^t \right) \\ &\leq \mathbb{E} \sum_{t=1}^T \sum_{i=1}^A \pi_i^t \min_{\tau_i \geq 0} \left( \frac{\|\mathbb{E}^t \lambda^{t*}\|_2^2}{2\tau_i(n_i^t + 1)} - \tau_i \log \pi_i^t \right) \\ &= \mathbb{E} \sum_{t=1}^T \sum_{i=1}^A \pi_i^t \sqrt{\frac{2(-\log \pi_i^t) \|\mathbb{E}^t \lambda^{t*}\|_2^2}{n_i^t + 1}} \\ &\leq C \mathbb{E} \sqrt{2 \left( \sum_{t=1}^T H(\pi^t) \right) \left( \sum_{t=1}^T \sum_{i=1}^A \frac{\pi_i^t}{n_i^t + 1} \right)} \\ &\leq C \sqrt{2TA \log A(1 + \log T)}, \end{aligned}$$

where we used the sub-Gaussian property Eq. (17), Cauchy-Schwarz, the fact that  $H(\pi^t) \leq \log A$ , and the fact that  $\|\lambda^{t*}\| \leq C$  almost surely which implies that  $\|\mathbb{E}^t \lambda^{t*}\| \leq C$ , due to Jensen's inequality.

Before we bound the remaining term observe that if zero-mean random variable  $X : \Omega \rightarrow \mathbb{R}$  is  $\sigma$ -sub-Gaussian, then the variance of  $X$  satisfies  $\text{var} X \leq \sigma^2$ , which is easily verified by a Taylor expansion of the cumulant generating function. Since the prior and noise terms are 1-sub-Gaussian for each entry of  $R$  this implies that

$$\text{var}^t R_{ij} \leq (n_i^t + 1)^{-1}, \quad (18)$$

where  $\mathbf{var}^t$  is the variance conditioned on  $\mathcal{F}_t$  and as before  $n_i^t$  is the number of times column  $i$  has been selected by the agent before time  $t$ . We bound the remaining term as follows

$$\begin{aligned}
\mathbb{E} \sum_{t=1}^T ((\pi^t)^\top \mathbb{E}^t R \mathbb{E}^t \lambda^{t*} - (\pi^t)^\top \mathbb{E}^t (R \lambda^{t*})) &= \mathbb{E} \sum_{t=1}^T (\pi^t)^\top \mathbb{E}^t ((\mathbb{E}^t R - R) \lambda^{t*}) \\
&= \mathbb{E} \sum_{t=1}^T \sum_{i=1}^A \pi_i^t \mathbb{E}^t ((\mathbb{E}^t R_i - R_i)^\top \lambda^{t*}) \\
&\leq \mathbb{E} \sum_{t=1}^T \sum_{i=1}^A \pi_i^t \sqrt{\mathbb{E}^t \|R_i - \mathbb{E}^t R_i\|_2^2 \mathbb{E}^t \|\lambda^{t*}\|_2^2} \\
&\leq C \mathbb{E} \sum_{t=1}^T \sum_{i=1}^A \pi_i^t \sqrt{\sum_{j=1}^m \mathbf{var}^t R_{ij}} \\
&\leq C \mathbb{E} \sum_{t=1}^T \sum_{i=1}^A \pi_i^t \sqrt{m/(n_i^t + 1)} \\
&\leq 2C \sqrt{TA m},
\end{aligned}$$

where we used Cauchy-Schwarz, the fact that  $\|\lambda^{t*}\| \leq C$  almost surely, the sub-Gaussian bound on the variance of  $R_{ij}$  from Eq. (18), and a pigeonhole principle. Combining the two upper bounds we have

$$\text{BayesRegret}(\phi, \text{alg}, T) \leq C \left( \sqrt{2 \log A (1 + \log T)} + 2\sqrt{m} \right) \sqrt{AT}.$$

□

## B Compute requirements

All experiments were run on a single 2017 MacBook Pro.
